# Supplementary material for: Pharmacologic inhibition of Akt in combination with chemotherapeutic agents effectively induces apoptosis in ovarian and endometrial cancer cell lines
Source: PubMed Central journal article supplement (PMC8334290; doi:10.1002/1878-0261.12888), 2021-01-04

# Supp. Fig 1

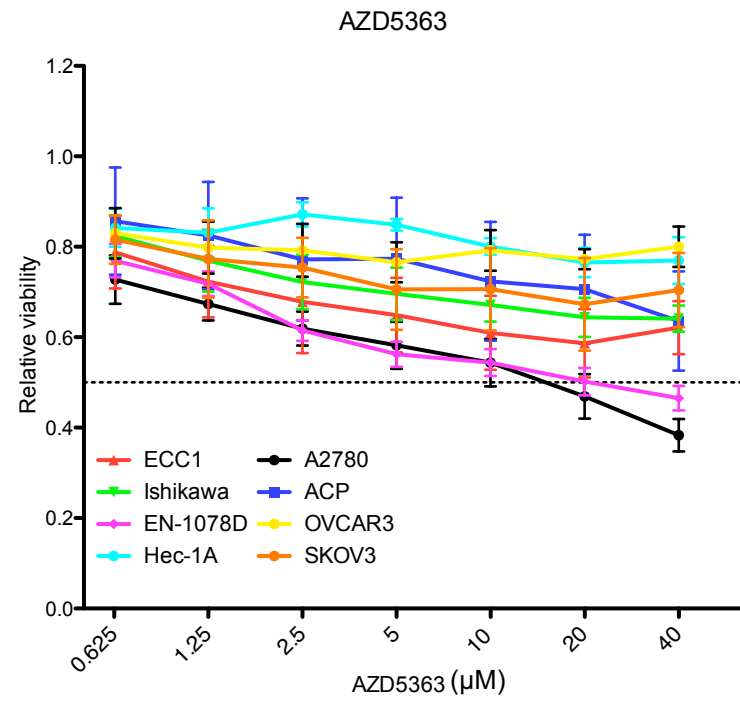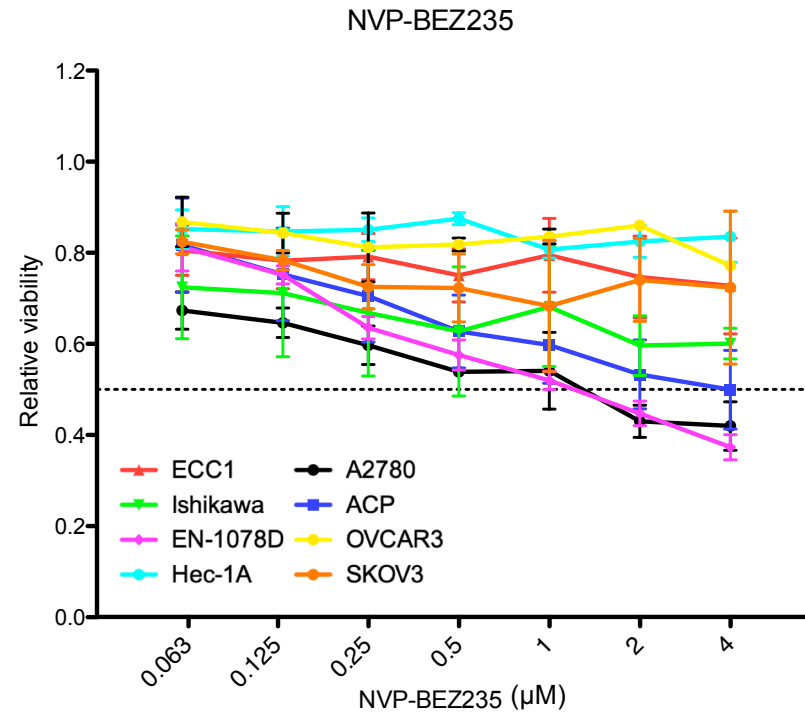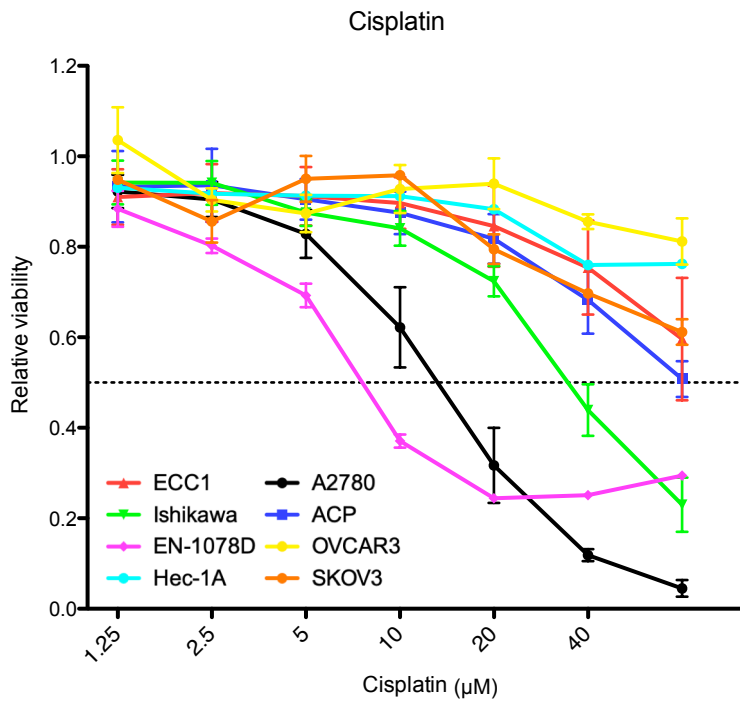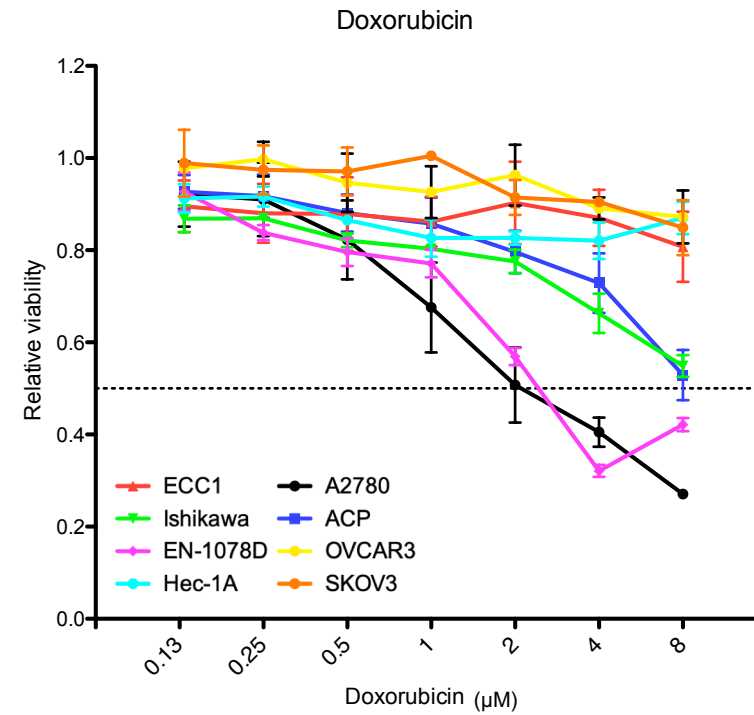

Supplement: MOL2-15-2106-s001.pdf [file MOL2-15-2106-s001.pdf]
